# Supplementary material
Source: PubMed Central journal article supplement (PMC5440245)
Supplement: supp_WNL.0000000000003955_Supplemental_Data.pdf [file supp_WNL.0000000000003955_Supplemental_Data.pdf]

## Cognitive function battery

The Look AHEAD battery of cognitive function tests included the following. The Trail Making Test Part A assessed attention and concentration and Part B assessed executive function.<sup>1</sup> The Modified Stroop Color and Word Test assess executive function.<sup>2,3</sup> The Digit Symbol-Coding Test assessed processing speed.<sup>4</sup> The Rey Auditory Verbal Learning Test (Delayed) assessed verbal learning and memory.<sup>5</sup> The Modified Mini-Mental State Exam assessed global cognitive function.<sup>6</sup> Each neurocognitive test in this battery has been validated previously. Tests were administered by centrally trained and certified examiners who were masked to intervention assignment.

Supplement Table: Mean levels of cognitive scores by age and intervention assignment with covariate adjustment for years since randomization.

| Cognitive Function                                 | Intervention Assignment*                       |                                                  |                                    |
|----------------------------------------------------|------------------------------------------------|--------------------------------------------------|------------------------------------|
|                                                    | Diabetes Support and Education (DSE) Mean (SE) | Intensive Lifestyle Intervention (ILI) Mean (SE) | Difference ILI – DSE Mean [95% CI] |
| Stroop Color Word Test                             | 34.67 (0.39)                                   | 34.76 (0.38)                                     | 0.09 [-0.98, 1.16]                 |
| Rey Auditory Verbal Learning Test (Delayed Recall) | 7.42 (0.08)                                    | 7.44 (0.08)                                      | 0.02 [-0.20, 0.24]                 |
| Modified Mini Mental State Exam                    | 91.37 (0.15)                                   | 91.52 (0.15)                                     | 0.15 [-0.28, 0.58]                 |
| Trail Making Test, (sec.)                          |                                                |                                                  |                                    |

|                     |               |               |                     |
|---------------------|---------------|---------------|---------------------|
| Part A              | 39.32 (0.41)  | 39.49 (0.40)  | 0.18 [-0.94, 1.30]  |
| Part B              | 112.71 (1.62) | 114.72 (1.60) | 2.01 [-2.45, 6.47]  |
| Digit Symbol Coding | 39.08 (0.25)  | 39.02 (0.25)  | -0.06 [-0.76, 0.64] |

## References

- <sup>1</sup>Reitan RM. The validity of the Trail Making Test as an indicator of organic brain damage. *Percept Motor Skills* 1958;8:271-6.
- <sup>2</sup>Stroop JR. Studies of interference in serial verbal reactions. *Exp Psychol* 1935;18:643-62.
- <sup>3</sup>Houx PJ, Jolles J, Vreeling FW. Stroop interference: aging effects assessed with the Stroop Color-Word Test. *Exp Aging Res* 1993;19:209-24.
- <sup>4</sup>Wechsler D. *WAIS-R manual*. New York: Psychological Corporation, 1981.
- <sup>5</sup>Lesak MD. *Neuropsychological Assessment*. New York: Oxford University Press, 1995.
- <sup>6</sup>Teng EL, Chui HC. The Modified Mini-Mental State (3MS) examination. *J Clin Psychiatry* 1987;48:314-8.
